# Supplementary material for: Functional group effects on structure and topology of cadmium(ii) frameworks with mixed organic ligands
Source: Royal Society of Chemistry journal article supplement (doi:10.1039/c5ra06072a), 2015-01-01
Supplement: c5ra06072a1.pdf [file c5ra06072a1.pdf]

*Electronic supplementary information (ESI)*

**Functional group effects on structure and topology of cadmium(II) frameworks with mixed organic ligands**

**Ji-Ai Hua, Yue Zhao, Dan Zhao, Yan-Shang Kang, Kai Chen and Wei-Yin Sun\***

*Coordination Chemistry Institute, State Key Laboratory of Coordination Chemistry, School of Chemistry and Chemical Engineering, Nanjing National Laboratory of Microstructures, Collaborative Innovation Center of Advanced Microstructures, Nanjing University, Nanjing 210093, China. E-mail: sunwy@nju.edu.cn; Fax: +86 25 83314502*

**Table S1** Selected bond lengths (Å) and angles (°) for **1 - 4**<sup>a</sup>

| <b>1</b>          |            |                 |            |
|-------------------|------------|-----------------|------------|
| Cd(1)-N(1)        | 2.276(3)   | Cd(1)-O(2)      | 2.477(3)   |
| Cd(1)-N(6)        | 2.287(3)   | Cd(1)-O(1)      | 2.558(4)   |
| Cd(1)-N(3)#1      | 2.439(3)   | Cd(1)-O(6)      | 2.579(3)   |
| Cd(1)-O(3)        | 2.339(3)   |                 |            |
| N(1)-Cd(1)-N(6)   | 95.53(11)  | O(3)-Cd(1)-O(2) | 90.53(10)  |
| N(6)-Cd(1)-O(3)   | 135.63(10) | N(1)-Cd(1)-O(1) | 100.23(11) |
| N(1)-Cd(1)-O(6)   | 97.50(11)  | N(1)-Cd(1)-O(2) | 84.58(10)  |
| N(1)-Cd(1)-N(3)#1 | 166.32(10) | O(3)-Cd(1)-O(1) | 136.50(10) |
| O(3)-Cd(1)-N(3)#1 | 79.76(10)  | O(2)-Cd(1)-O(1) | 51.93(11)  |
| N(6)-Cd(1)-N(3)#1 | 96.34(10)  | N(6)-Cd(1)-O(6) | 83.15(10)  |
| <b>2</b>          |            |                 |            |
| Cd(1)-N(1)        | 2.267(4)   | Cd(1)-O(2)      | 2.296(4)   |

|                   |            |                     |            |
|-------------------|------------|---------------------|------------|
| Cd(1)-N(5)#1      | 2.298(4)   | Cd(1)-O(4)#2        | 2.317(3)   |
| Cd(1)-N(3)#3      | 2.431(4)   | Cd(1)-O(1)          | 2.643(5)   |
| N(1)-Cd(1)-N(5)#1 | 97.01(17)  | N(5)#1-Cd(1)-N(3)#3 | 164.33(15) |
| N(1)-Cd(1)-O(2)   | 122.22(15) | O(4)#2-Cd(1)-N(3)#3 | 78.07(14)  |
| N(1)-Cd(1)-N(3)#3 | 88.46(15)  | N(3)#3-Cd(1)-O(1)   | 111.49(15) |
| N(5)#1-Cd(1)-O(2) | 107.45(15) | O(2)-Cd(1)-O(4)#2   | 100.27(13) |
| O(2)-Cd(1)-O(1)   | 51.84(14)  | O(4)#2-Cd(1)-O(1)   | 145.75(12) |
| N(1)-Cd(1)-O(4)#2 | 132.97(13) | O(2)-Cd(1)-N(3)#3   | 81.53(14)  |

---

### 3

|                     |           |                     |            |
|---------------------|-----------|---------------------|------------|
| Cd(1)-N(5)#1        | 2.261(2)  | Cd(1)-O(2)          | 2.3494(19) |
| Cd(1)-N(1)          | 2.350(2)  | Cd(1)-O(4)#2        | 2.357(2)   |
| Cd(1)-N(3)#3        | 2.458(2)  | Cd(1)-O(3)#2        | 2.505(2)   |
| N(5)#1-Cd(1)-O(2)   | 132.52(8) | N(1)-Cd(1)-N(3)#3   | 161.57(9)  |
| (5)#1-Cd(1)-N(1)    | 92.50(8)  | O(2)-Cd(1)-O(3)#2   | 138.73(7)  |
| O(2)-Cd(1)-N(1)     | 87.24(8)  | O(4)#2-Cd(1)-O(3)#2 | 53.65(7)   |
| N(5)#1-Cd(1)-O(4)#2 | 142.08(8) | O(2)-Cd(1)-O(1)     | 52.13(7)   |
| O(2)-Cd(1)-O(4)#2   | 85.11(7)  | O(4)#2-Cd(1)-O(1)   | 136.48(7)  |
| N(5)#1-Cd(1)-N(3)#3 | 105.24(8) | O(3)#2-Cd(1)-O(1)   | 166.59(7)  |

---

### 4

|                   |           |                     |          |
|-------------------|-----------|---------------------|----------|
| Cd(1)-N(1)        | 2.287(3)  | Cd(1)-O(1)          | 2.300(3) |
| Cd(1)-N(5)#1      | 2.351(3)  | Cd(1)-O(3)#3        | 2.416(2) |
| Cd(1)-N(3)#2      | 2.363(3)  | Cd(1)-O(4)#3        | 2.474(2) |
| N(1)-Cd(1)-O(1)   | 138.77(9) | N(5)#1-Cd(1)-O(3)#3 | 89.03(9) |
| N(1)-Cd(1)-N(5)#1 | 90.31(9)  | N(3)#2-Cd(1)-O(3)#3 | 90.84(9) |

|                     |            |                     |           |
|---------------------|------------|---------------------|-----------|
| O(1)-Cd(1)-N(5)#1   | 93.22(9)   | N(1)-Cd(1)-O(4)#3   | 86.59(9)  |
| N(1)-Cd(1)-N(3)#2   | 89.12(9)   | O(1)-Cd(1)-O(4)#3   | 134.63(9) |
| N(5)#1-Cd(1)-N(3)#2 | 178.94(10) | N(5)#1-Cd(1)-O(4)#3 | 85.59(9)  |
| O(1)-Cd(1)-O(3)#3   | 81.08(9)   | O(3)#3-Cd(1)-O(4)#3 | 53.57(8)  |

<sup>a</sup> Symmetry transformations used to generate equivalent atoms: #1  $x-1, y+1, z$  for **1**; #1  $-x+5/2, y+1/2, -z+1/2$ ; #2  $x+1/2, -y+1/2, z+1/2$ ; #3  $-x+2, -y, -z+1$  for **2**; #1  $-x, y+1/2, -z-1/2$ ; #2  $x, y, z-1$ ; #3  $-x+1, -y+2, -z$  for **3**; #1  $x-1/2, -y+1/2, -z+2$ ; #2  $2x+1/2, -y+1/2, -z+2$ ; #3  $-x+3/2, y-1/2, z$  for **4**.

**Table S2** Hydrogen bonding data for **4**.

---

Complex **4**

| $D-H \cdots A$        | $d(D \cdots A)$ (Å) | $\angle D-H \cdots A$ (°) |
|-----------------------|---------------------|---------------------------|
| C5-H5A $\cdots$ O3#1  | 3.469(4)            | 175                       |
| C12-H12 $\cdots$ O1#2 | 3.248(4)            | 149                       |

Symmetry codes: #1  $3/2-x, 1-y, 1/2+z$ ; #2  $x, 1/2-y, 1/2+z$ .

---

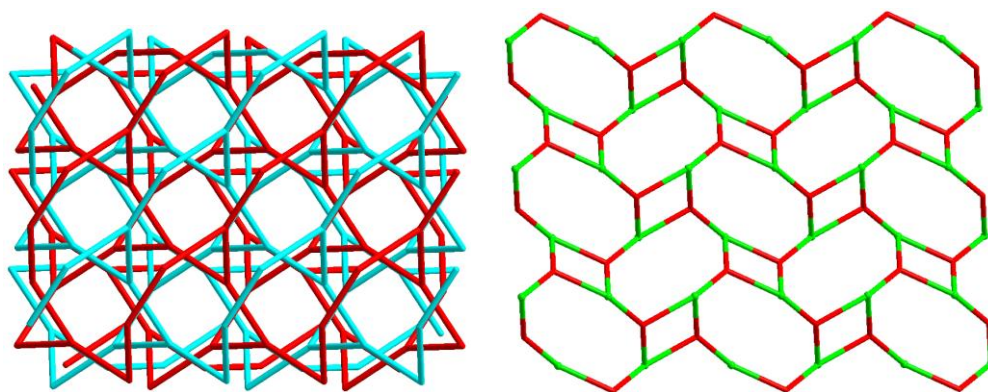

**Fig. S1** (a) The schematic representation of 2-fold interpenetrating framework of Cd(II)-tib in **1**. (b) Topology of the Cd(II)-tib 2D network in **2**.

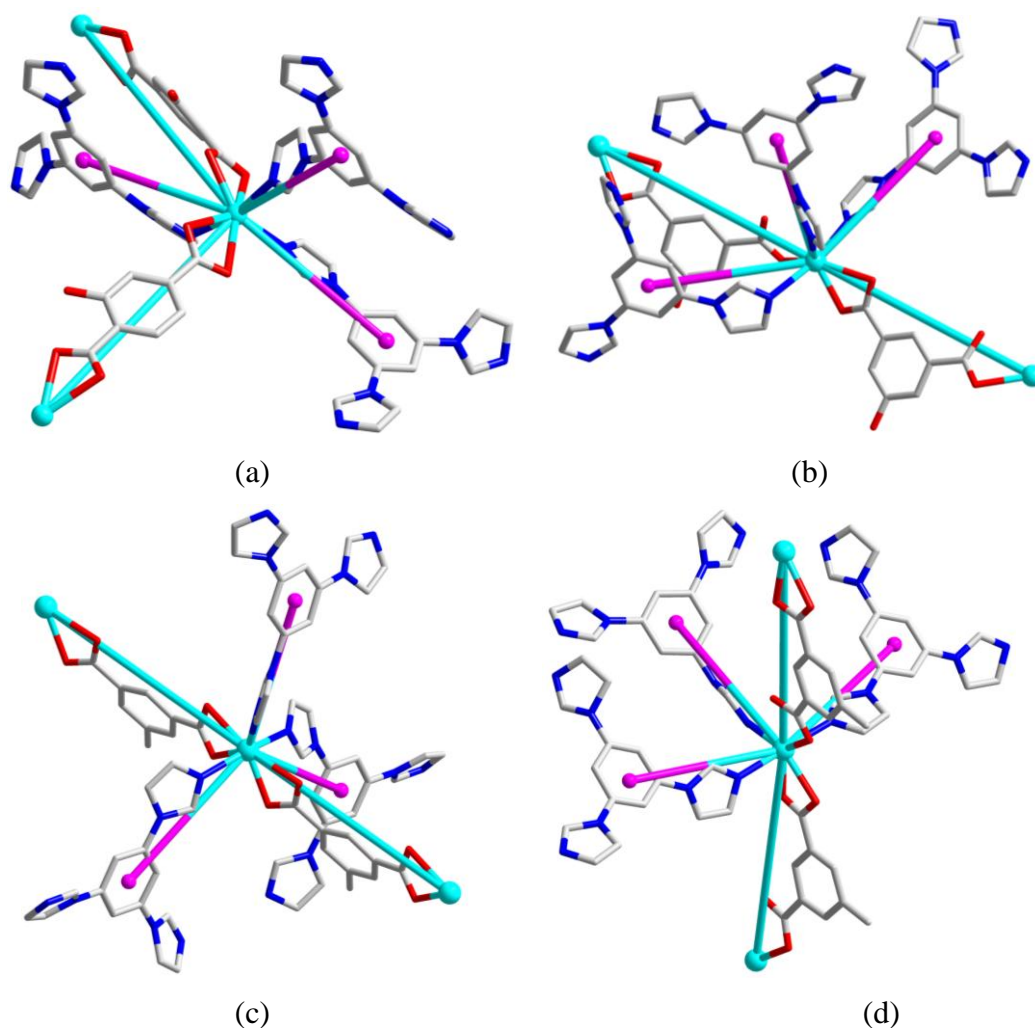

**Fig. S2** The 5-connected node of Cd building unit in **1** (a) - **4** (d).

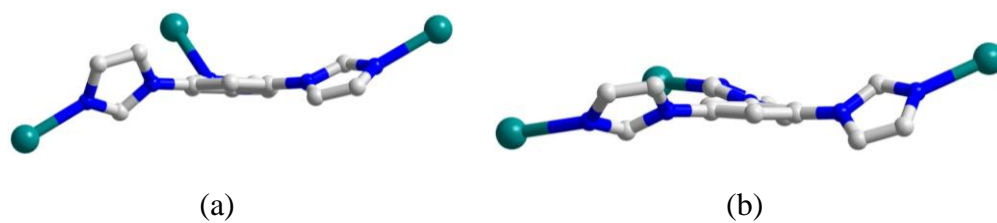

**Fig. S3** Coordination modes of tib with Cd (II) in **2** (a) and **3** (b).

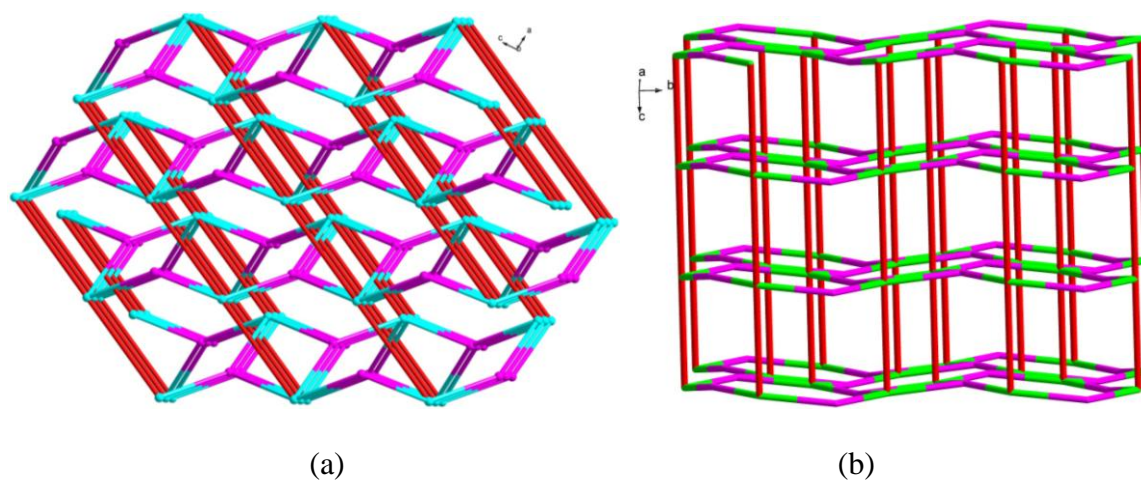

**Fig. S4** The illustrations of the 3D nets formed by Cd-tib 2D networks and Cd-*m*-BDC-R 1D chains in **2** (a) and **3** (b). The Cd-*m*-BDC-R 1D chains are indicated by red lines.

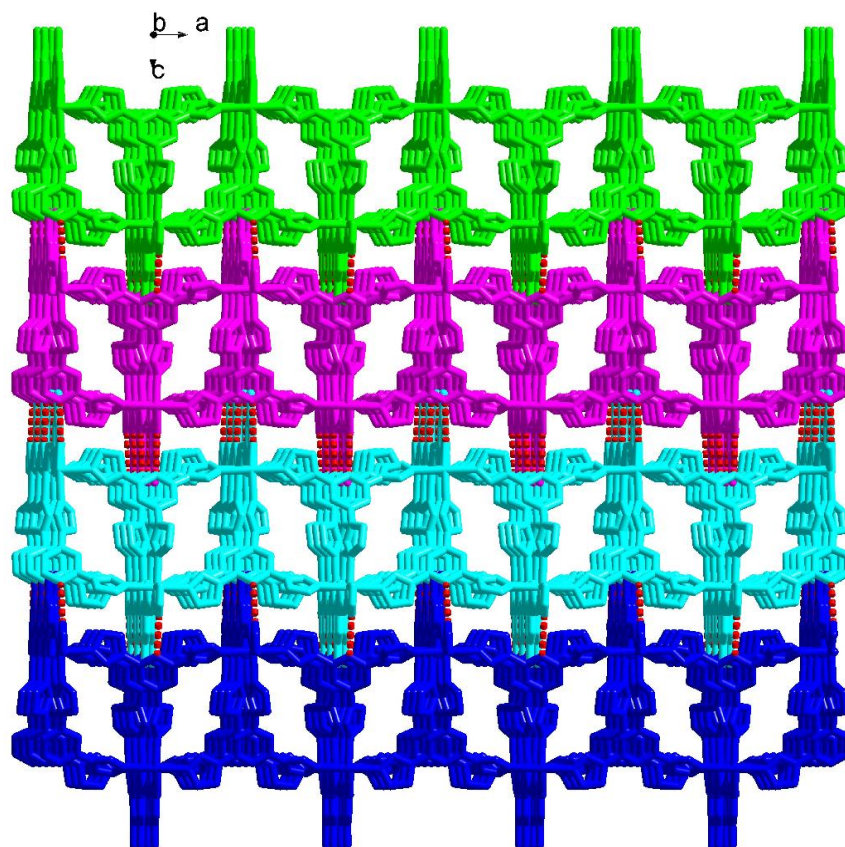

**Fig. S5** The 3D supramolecular structure of **4** with 2D layers linked by hydrogen bonds: different color indicates the different layers. The hydrogen bonds are indicated by dashed lines.

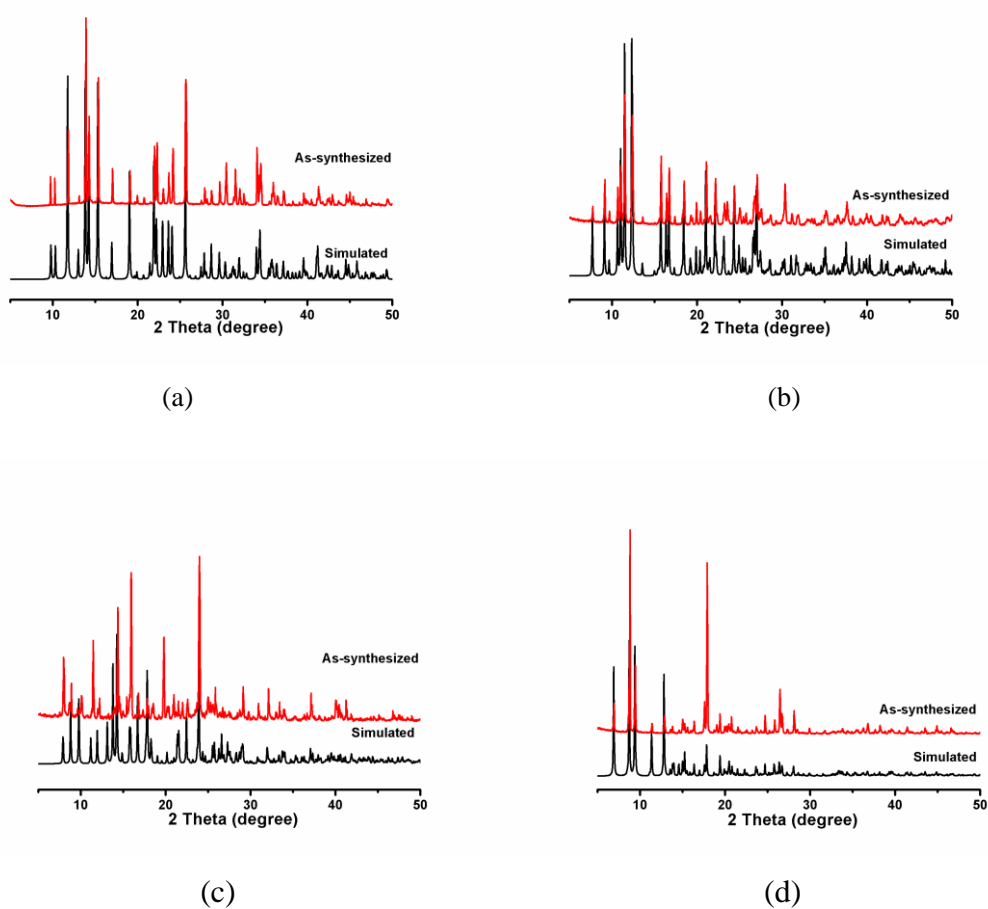

**Fig. S6** The PXRD patterns of **1** (a) - **4** (d).

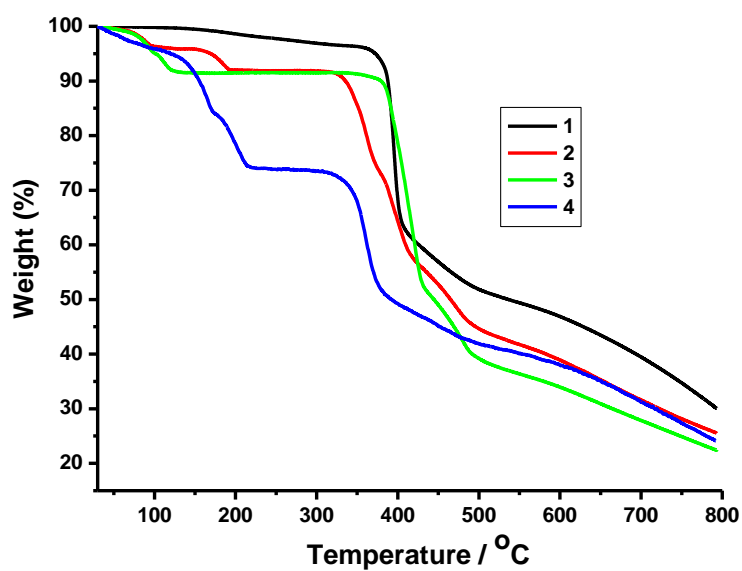

**Fig. S7** The TGA curves of **1** - **4**.
